# Supplementary material for: Orthodontic and dentofacial orthopedic treatments in patients with ectodermal dysplasia: a systematic review
Source: PubMed Central journal article supplement (PMC9575248; doi:10.1186/s13023-022-02533-0), 2022-10-17
Supplement: 13023_2022_2533_MOESM1_ESM.pdf [file 13023_2022_2533_MOESM1_ESM.pdf]

**Supplementary Table 1. Responses to the Joanna Briggs Institute Critical assessment items for Case Reports.**

| CASE REPORTS                                      |          |     |     |     |     |     |         |     |
|---------------------------------------------------|----------|-----|-----|-----|-----|-----|---------|-----|
| Author(s)/year                                    | Item No. |     |     |     |     |     |         |     |
|                                                   | 1        | 2   | 3   | 4   | 5   | 6   | 7       | 8   |
| Karwetzky R <i>et al.</i> (1974) [41]             | Yes      | Yes | Yes | Yes | Yes | Yes | Yes     | Yes |
| Waggoner WF <i>et al.</i> (1987) [45]             | Yes      | Yes | Yes | Yes | Yes | Yes | Unclear | Yes |
| Itthagarun A <i>et al.</i> (2000) [46]            | Yes      | Yes | Yes | Yes | Yes | Yes | Yes     | Yes |
| Köymen G <i>et al.</i> (2003) [64]                | Yes      | Yes | Yes | Yes | Yes | Yes | Unclear | Yes |
| Suri S <i>et al.</i> (2004) [47]                  | Yes      | No  | Yes | Yes | Yes | Yes | Unclear | Yes |
| Yenisey M <i>et al.</i> (2004) [48]               | Yes      | Yes | Yes | Yes | Yes | Yes | Unclear | Yes |
| Gruber J <i>et al.</i> (2006) [49]                | Yes      | No  | Yes | Yes | Yes | Yes | Yes     | Yes |
| Altug- Atac AT <i>et al.</i> (2008) [50]          | Yes      | Yes | Yes | Yes | Yes | Yes | Unclear | Yes |
| Ioannidou-Marathiotou I <i>et al.</i> (2010) [51] | Yes      | Yes | Yes | Yes | Yes | Yes | Yes     | Yes |
| Van Sickels JE <i>et al.</i> (2010) [44]          | Yes      | No  | Yes | Yes | Yes | Yes | Unclear | Yes |
| Akgun OM <i>et al.</i> (2010) [52]                | Yes      | No  | Yes | Yes | Yes | Yes | Unclear | Yes |
| Machorowska-Pieniżek A <i>et al.</i> (2012) [53]  | Yes      | No  | Yes | Yes | Yes | No  | Yes     | Yes |
| Oblack C <i>et al.</i> (2013) [66]                | Yes      | Yes | Yes | Yes | Yes | Yes | Unclear | Yes |
| Priya V <i>et al.</i> (2013) [54]                 | Yes      | Yes | Yes | Yes | Yes | Yes | Unclear | Yes |
| Fraiz FC <i>et al.</i> (2014) [55]                | Yes      | No  | Yes | Yes | Yes | Yes | Unclear | Yes |
| Shah R <i>et al.</i> (2014) [43]                  | Yes      | Yes | Yes | Yes | Yes | Yes | Unclear | Yes |
| Suja J <i>et al.</i> (2014) [56]                  | Yes      | Yes | Yes | Yes | Yes | Yes | Unclear | Yes |
| Bergendal B <i>et al.</i> (2015) [57]             | Yes      | Yes | Yes | Yes | Yes | Yes | Unclear | Yes |

|                                                   |     |     |     |     |     |     |         |     |     |
|---------------------------------------------------|-----|-----|-----|-----|-----|-----|---------|-----|-----|
| Knobloch LA <i>et al.</i> (2018) [59]             | Yes | No  | Yes | Yes | Yes | Yes | Yes     | Yes | Yes |
| Celli D <i>et al.</i> (2018) [15]                 | Yes | Yes | Yes | Yes | Yes | Yes | Unclear | Yes | Yes |
| Kuźniarski A <i>et al.</i> (2018) [16]            | Yes | Yes | Yes | Yes | Yes | Yes | Yes     | Yes | Yes |
| Yajing L <i>et al.</i> (2019) [61]                | Yes | No  | Yes | Yes | Yes | Yes | Yes     | Yes | Yes |
| Ierardo G <i>et al.</i> (2019) [62]               | Yes | Yes | Yes | Yes | Yes | Yes | No      | Yes | Yes |
| Szemraj-Folmer A <i>et al.</i> (2019) [63]        | Yes | No  | Yes | Yes | Yes | Yes | Yes     | Yes | Yes |
| Wimalarathna A. A. A. K <i>et al.</i> (2020) [14] | Yes | Yes | Yes | Yes | Yes | Yes | Unclear | Yes | Yes |
| Gonzaga Luiz H. <i>et al.</i> (2021) [42]         | Yes | Yes | Yes | Yes | Yes | Yes | Yes     | Yes | Yes |

**Supplementary Table 2. Responses to the Joanna Briggs Institute Critical assessment items for Case Series.**

| CASE SERIES                            |          |     |     |    |     |     |     |     |     |    |
|----------------------------------------|----------|-----|-----|----|-----|-----|-----|-----|-----|----|
| Author(s)/year                         | Item No. |     |     |    |     |     |     |     |     |    |
|                                        | 1        | 2   | 3   | 4  | 5   | 6   | 7   | 8   | 9   | 10 |
| Fotso J <i>et al.</i> (2009) [65]      | Yes      | No  | No  | No | Yes | Yes | Yes | Yes | Yes | No |
| Kościelska N <i>et al.</i> (2016) [58] | Yes      | Yes | Yes | No | Yes | Yes | Yes | Yes | Yes | No |
| Schanbl D <i>et al.</i> (2018) [60]    | Yes      | Yes | Yes | No | Yes | Yes | Yes | Yes | Yes | No |
